# Supplementary material for: Loss of CCDC6, the First Identified RET Partner Gene, Affects pH2AX S139 Levels and Accelerates Mitotic Entry upon DNA Damage
Source: PLoS One. 2012 May 24;7(5):e36177. doi: 10.1371/journal.pone.0036177 (PMC3360053; doi:10.1371/journal.pone.0036177)
Supplement: File S1 — Supplementary experimental procedures and materials. (DOC) [file pone.0036177.s007.doc]

**Supplementary Experimental Procedures and Materials**

*Chromatin extraction*

2 x 106 cells were lysed in 100 l of CSK buffer (10 mM Pipes-KOH pH 6.8, 100mM NaCl, 300mM Sucrose, 1.5 mM MgCl2) containing 0.5% TritonX100, supplemented with Proteinase and Phosphatase inhibitors. Lysates were incubated on ice for 10 minutes and then centrifuged at 1500 x g for 5 minutes at 4°C. Supernatant was removed, pellets were washed with 1 ml of lysis buffer and centrifuged again. Pellets were incubated in 100 l of CSK buffer containing 1U/l of Benzonase (Novagen) for 1h at room temperature. After centrifugation supernatant was collected, boiled in 1X Laemli loading dye.

*RNA interference and short hairpin mission*

All siRNAs employed in this study were purchased from Sigma Aldrich. All RNAi transfections were performed using Oligofectamine Reagent (invitrogen). Individual siRNA are PPAR1: 5’-GGAGCUCAUUGAACGAUUUUU-3’ and 5’-AAAAAUCGUUCAAUGAGCUCC-3’. PP4R4: #N1 5’-GAACAAGUGUGAUUGCAAAUU-3’ and 5’-AAUUUGCAAUCACACUUGUUC-3’; #N2 5’-UGAAAGGGCUGUUUAUCUGUU-3’ and 5’-AACAGAUAAACAGCCCUUUCA-3’; #N3 5’-GAUUGACAGUCGAUGAAGAAUCG-3’ and 5’-AAUCUUCAUCGACUGUCAAUCCG-3’; #N4 5’-GCGAUGGAUUUCAGUCAGAUU-3’ and 5’-AAUCUGACUGAAAUCCAUCGC-3’. PP4R3α: 5’-UGAAUUAAGUCGCCUUGAAUU-3’ and 5’-UUCAAGGCGACUUAAUUCAUU-3’. PP4R3β: 5’-CCAUCUAUAUUGCGUAGUAUU-3’ and 5’-UACUACGCAAUAUAGAUGGUU-3’.

Silencing of PP4R2 and PP4C were purchased from MISSION shRNA Plasmid DNA from Sigma-Aldrich and were transfected using Fugene-HD (Roche).

PP4R2 #N1 CCGGGCCCTGTAAGTAGTAGTTCTTCTCGAGAAGAACTACTACTTACAGGGCTTTTT

PP4R2 #N2

CCGGCGTGAAACAGAAGAATTAGTACTCGAGTACTAATTCTTCTGTTTCAGGTTTTT.

PP4C Mission shRNA pool Bacterial Glycerol Stock: SHGLY-NM_002720.

All experiments were performed from 48 to 72 h post transfection.

*Indirect immunofluorescence*

The indirect immunofluorescence was performed as previously described [15]).

*Antibodies*

We employed the following antibodies: mouse anti-pH2AX S139 (Upstate, clone JBW301), rabbit anti-H2AX (Cell Signaling), rabbit anti-PP4C antibody (Bethyl, A300-835A), rabbit anti-PP4R2 antibody (Bethyl, A300-838A), rabbit anti-PP4R1 antibody (Bethyl, A300-836A), rabbit anti-PP4R3 (Bethyl, A300-840A), rabbit anti-PP4R3 (Bethyl, A300-842A), rabbit anti-PP4R4 (abcam, ab111419), rabbit anti-PPM1D (Bethyl, A300-664A), rabbit anti Phospho RPA32 (S33) (Bethyl, A300-264A), rabbit anti RPA32 (Bethyl, A300-244A), rabbit anti-PPP6C (Bethyl, A300-844A), mouse anti-CCDC6 (abcam ab56353), mouse anti-phospho-Ser/Thr-Pro, MPM2 (Upstate, 05-368), mouse anti-phosphohistone H3 (Ser 10, Cell Signaling, clone 6G3), rabbit anti-MDC1, (abcam, ab 11171), mouse anti-phospho-ATM (Ser1981) (Cell Signaling, #4526), mouse anti-HA (F-7) (7392 SCBT, Inc), mouse anti-tubulin (Sigma-Aldrich Co. LLC.)
